# Supplementary material for: Application of a novel electrochemical sensor based on modified siliceous mesocellular foam for electrochemical detection of ultra-trace amounts of mercury ions
Source: Royal Society of Chemistry journal article supplement (doi:10.1039/c5nj02973b), 2016-01-01

## Electronic Supplementary Material

### **Application of a novel electrochemical sensor based on modified siliceous mesocellular foam for electrochemical detection of ultra-trace amounts of mercury ions**

Majid Kalate Bojdi<sup>a</sup>, Mohammad Behbahani<sup>b,\*</sup>, Fariborz Omid<sup>c</sup>, Ghasem Hesam<sup>d</sup>

<sup>a</sup> *Faculty of Chemistry, Kharazmi (Tarbiat Moallem) University, Tehran, Iran*

<sup>b</sup> *Department of Chemistry, Shahid Beheshti University, G.C., Tehran 1983963113, Iran*

<sup>c</sup> *Department of Occupational Health Engineering, School of Public Health, Tehran University of Medical Sciences, Tehran, Iran*

<sup>d</sup> *Department of Occupational Health Engineering, School of Public Health, Shahroud University of Medical Sciences, Shahroud, Iran*

#### **Corresponding author:**

\* Mohammad Behbahani. Tel.: +98 21 22431661; Fax: +98 21 22431683

E-mail addresses: Mohammadbehbahani89@yahoo.com

**Figure 1S.** FT-IR spectra of (a) pure MCF, (b) MCF-Cl and (c) MCF-DTZ.

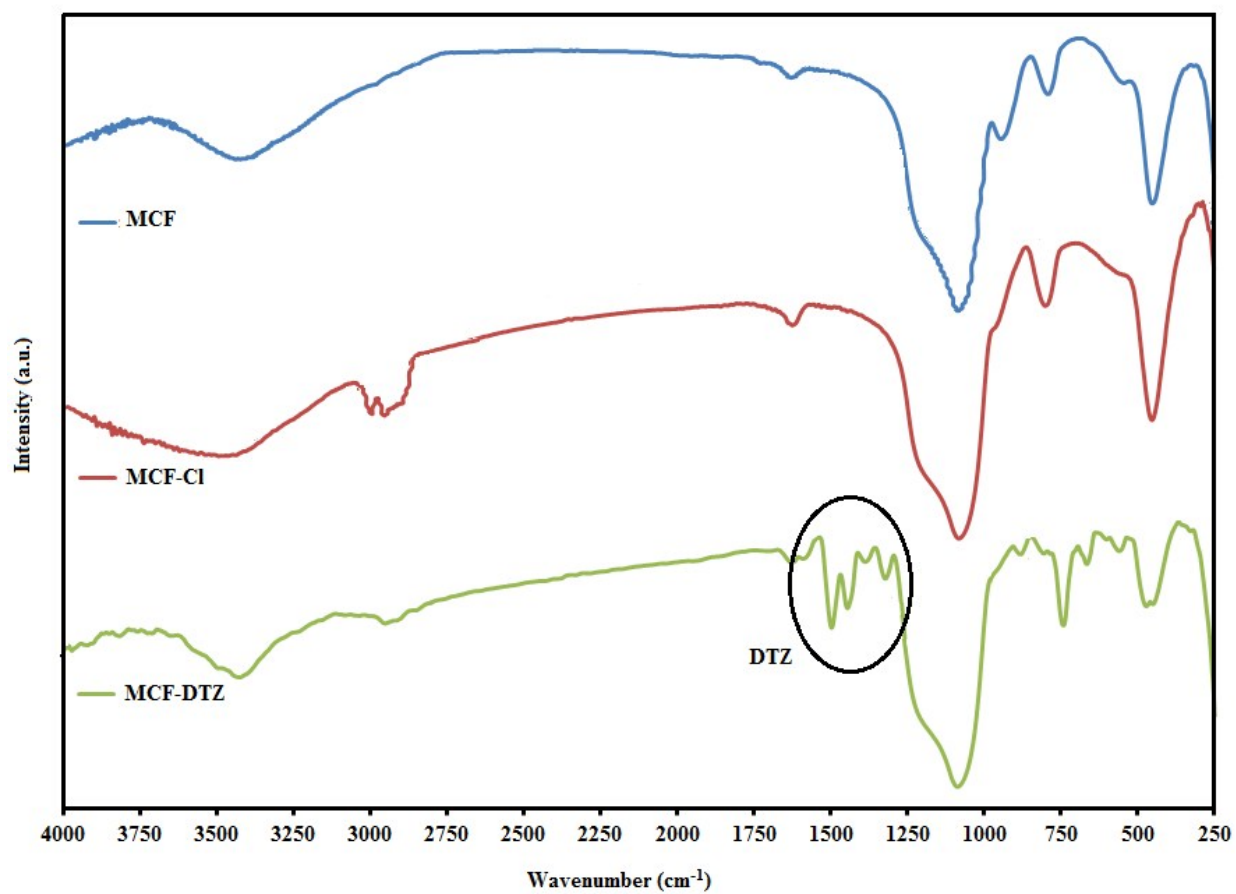

**Figure 2S.** TGA-DTA analysis of MCF-DTZ.

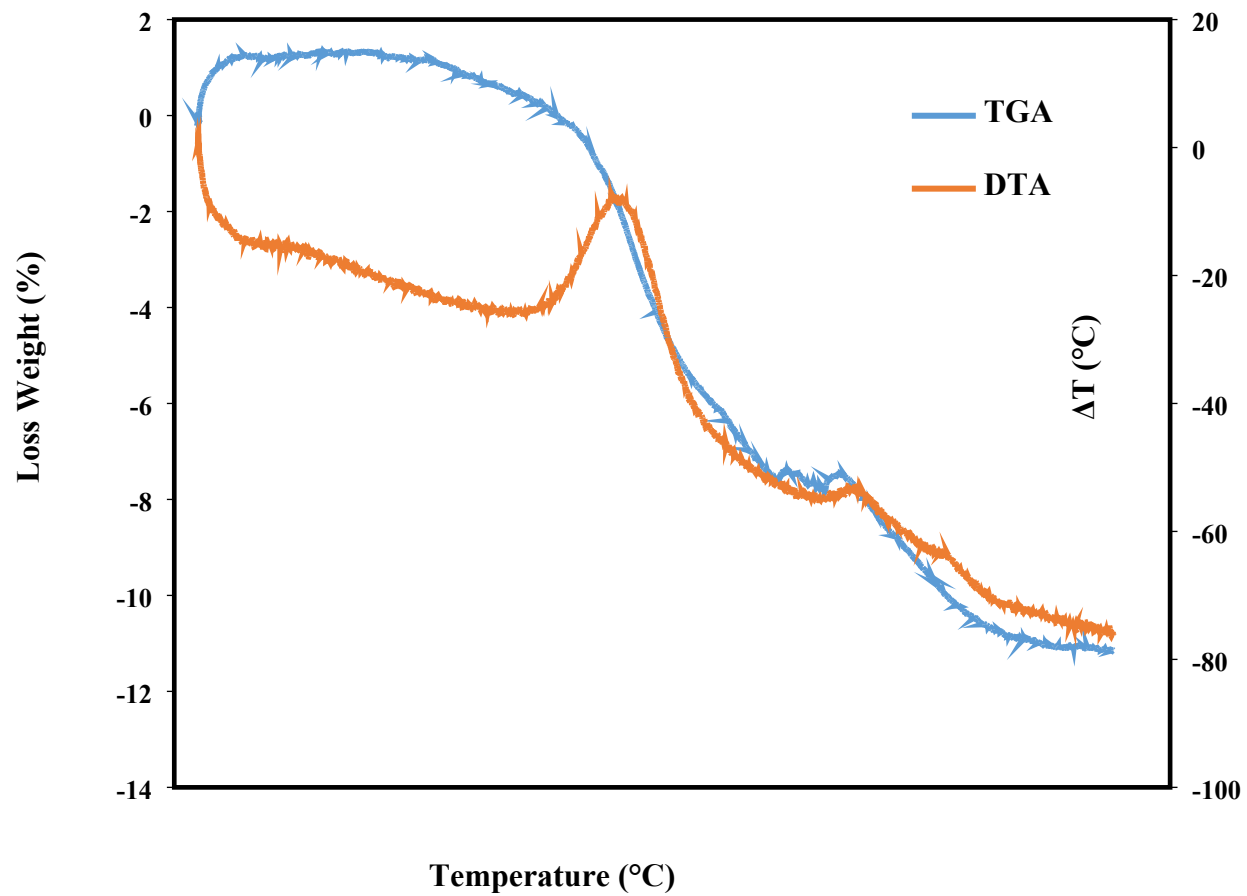

Supplement: c5nj02973b1.pdf [file c5nj02973b1.pdf]
